# Supplementary material for: Exploring Clinical Risk Factors for Breast Cancer Among American Indian Women
Source: PubMed Central journal article supplement (PMC9247609; doi:10.3389/fpubh.2022.840280), 2022-06-17
Supplement: Table_1.pdf [file Table_1.pdf]

## APPENDIX

Table 1A. Radiology, electronic and medical chart review - percent complete for cases/controls.

|                            | Cases |         | Controls |         |
|----------------------------|-------|---------|----------|---------|
|                            | n     | %       | n        | %       |
| <b>Total n=419</b>         | 141   | (100.0) | 278      | (100.0) |
|                            |       |         |          |         |
| <b>Radiology review</b>    | 110   | (78.0)  | 278      | (100.0) |
| <b>Electronic</b>          |       |         |          |         |
| <b>review</b>              | 102   | (72.3)  | 277      | (99.6)  |
| <b>Medical</b>             |       |         |          |         |
| <b>chart review</b>        | 70    | (49.6)  | 141      | (50.7)  |
|                            |       |         |          |         |
| <b>No Radiology review</b> | 31    | (22.0)  | 0        | (0.0)   |

Table 2A. Prevalence of maternal characteristics from Gail model based on original and adjusted categories.

| Original Categories                                              |                | Adjusted Categories |                |                |                   |
|------------------------------------------------------------------|----------------|---------------------|----------------|----------------|-------------------|
|                                                                  | Cases<br>N (%) | Controls<br>N (%)   |                | Cases<br>N (%) | Controls<br>N (%) |
| <b>Age at screening</b>                                          |                |                     |                |                |                   |
| <50                                                              | 43 (30.5)      | 91 (32.73)          | <56            | 69 (48.94)     | 137 (49.28)       |
| ≥50                                                              | 98 (69.5)      | 187 (67.27)         | ≥56            | 72 (51.06)     | 141 (50.72)       |
| <b>Age at first live birth</b>                                   |                |                     |                |                |                   |
| <20                                                              | 72 (51.06)     | 139 (50.00)         | <18            | 36 (25.53)     | 56 (20.14)        |
| 20 to 24                                                         | 48 (34.04)     | 106 (38.13)         | 18 to 19       | 36 (25.53)     | 83 (29.86)        |
| 25 to 29                                                         | 5 (3.55)       | 14 (5.04)           | 20 to 21       | 31 (21.99)     | 76 (27.34)        |
| ≥30                                                              | 3 (2.13)       | 8 (2.88)            | ≥22            | 25 (17.73)     | 52 (18.71)        |
| Nulliparous                                                      | 13 (9.22)      | 11 (3.96)           | Nulliparous    | 13 (9.22)      | 11 (3.96)         |
| <b>Age at onset of menstruation</b>                              |                |                     |                |                |                   |
| ≥14                                                              | 39 (27.66)     | 98 (35.25)          | ≥14            | 39 (27.66)     | 98 (35.25)        |
| 12 to 13                                                         | 79 (56.03)     | 129 (46.40)         | 13             | 36 (25.53)     | 69 (24.82)        |
| <12                                                              | 23 (16.31)     | 51 (18.35)          | 12             | 43 (30.50)     | 60 (21.58)        |
|                                                                  |                |                     | <12            | 23 (16.31)     | 51 (18.35)        |
| <b>Number of previous benign breast biopsies</b>                 |                |                     |                |                |                   |
| 0                                                                | 111 (78.72)    | 221 (79.50)         | 0              | 111 (78.72)    | 221 (79.50)       |
| 1                                                                | 25 (17.73)     | 51 (18.35)          | ≥1             | 30 (21.28)     | 57 (20.25)        |
| ≥2                                                               | 5 (3.55)       | 6 (2.16)            |                |                |                   |
| <b>Total number of first-degree relatives with breast cancer</b> |                |                     |                |                |                   |
| 0                                                                | 104 (73.76)    | 216 (77.70)         | 0              | 104 (73.76)    | 216 (77.70)       |
| 1                                                                | 31 (21.99)     | 53 (19.06)          | ≥1             | 37 (26.24)     | 62 (22.30)        |
| ≥2                                                               | 6 (4.26)       | 9 (3.24)            |                |                |                   |
| <b>BMI, kg/m<sup>2</sup></b>                                     |                |                     |                |                |                   |
| <25                                                              | 15 (10.64)     | 29 (10.43)          | <25            | 15 (10.64)     | 29 (10.43)        |
| 25-30                                                            | 50 (35.46)     | 92 (33.09)          | 25 to 29.99    | 39 (27.66)     | 77 (27.70)        |
| >30                                                              | 76 (53.90)     | 157 (56.47)         | 30 to 32.49    | 34 (24.11)     | 66 (23.74)        |
|                                                                  |                |                     | 32.50 to 34.99 | 22 (15.60)     | 29 (10.43)        |
|                                                                  |                |                     | ≥35            | 31 (21.99)     | 77 (27.70)        |
| <b>Parity (# of live births)</b>                                 |                |                     |                |                |                   |
| ≥5                                                               | 47 (33.33)     | 103 (37.05)         | ≥5             | 47 (33.33)     | 103 (37.05)       |
| 4                                                                | 18 (12.77)     | 44 (15.83)          | 3 to 4         | 46 (32.62)     | 108 (38.85)       |
| 3                                                                | 28 (19.86)     | 64 (23.02)          | 1 to 2         | 35 (24.82)     | 56 (20.14)        |
| 2                                                                | 26 (18.44)     | 41 (14.75)          | Nulliparous    | 13 (9.22)      | 11 (3.96)         |
| 1                                                                | 9 (6.38)       | 15 (5.40)           |                |                |                   |
| Nulliparous                                                      | 13 (9.22)      | 11 (3.96)           |                |                |                   |
